# Supplementary material
Source: Springer Nature journal article supplement (https://www.springermedizin.de/resource/supplementary/12889_2010_3039_MOESM1_ESM.pdf/9487936)

Mean Parental Attitudes

2.90  
2.85  
2.80  
2.75  
2.70  
2.65  
2.60  
2.55  
2.50

pre-test

post-test

- - Comparison      — Program

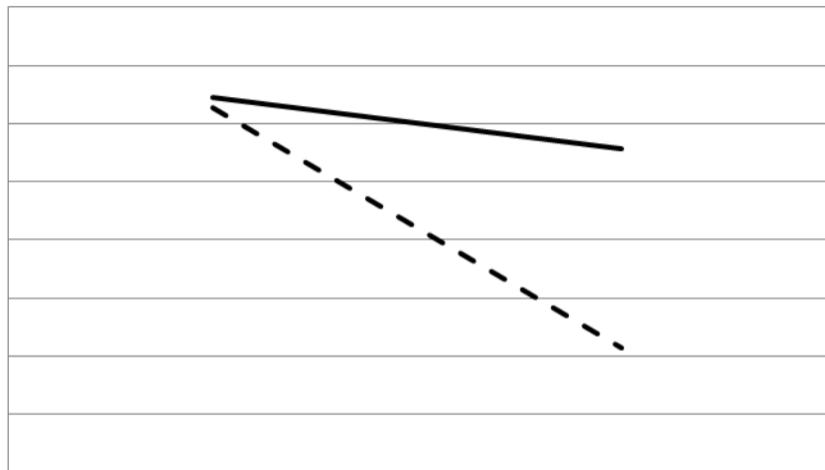

Supplement: MOESM1 [file 9487936]
